# Supplementary material
Source: publisher figshare collection journal article supplement (https://aacr.figshare.com/articles/dataset/_/23560954)
Supplement: Supplementary file 1 [file 41334760]

## Supplemental Materials

### **Wnt signaling stimulates cooperation between GREB1 and HNF4 $\alpha$ to promote proliferation in hepatocellular carcinoma**

Shinji Matsumoto, Akikazu Harada, Minami Seta, Masayuki Akita, Hidetoshi Gon, Takumi Fukumoto, Akira Kikuchi

Supplemental Materials 1-3.

## Supplemental Material 1

| Antigen   | Company                   | Catalog#    | Purpose | Dilution ratio |
|-----------|---------------------------|-------------|---------|----------------|
| β-Catenin | BD Biosciences            | #610154     | WB      | 1/1000         |
|           |                           |             | IHC     | 1/100          |
| β-Catenin | Cell Signaling Technology | 8480S       | ChIP    |                |
| FOXA2     | R&D Systems               | AF2400      | ChIP    |                |
|           |                           |             | PLA     | 1/100          |
| FOXA2     | Cell Signaling Technology | #8186S      | WB      | 1/1000         |
|           |                           |             | PLA     | 1/100          |
| GAPDH     | Fujifilm Wako             | 016-25523   | WB      | 1/1000         |
| GREB1     | Cell Signaling Technology | #65171      | WB      | 1/1000         |
| GREB1     | Merck Millipore           | #MABS62     | IHC     | 1/100          |
| GREB1     | Proteintech               | 28699-1-AP  | ChIP    |                |
| GREB1     | Abcam                     | ab72999     | PLA     | 1/100          |
| GLUL (GS) | Merck Millipore           | MAB302      | WB      | 1/1000         |
|           |                           |             | IHC     | 1/100          |
| GPC3      | Nichirei Biosciences      | 418021      | IHC     | Undiluted      |
| HNF4α     | Cell Signaling Technology | 3113S       | WB      | 1/1000         |
|           |                           |             | PLA     | 1/100          |
| HNF4α     | Perseus Proteomics        | PP-H1415-00 | ChIP    |                |
| HSP90     | BD Biosciences            | #610419     | WB      | 1/1000         |
| H3K27ac   | Active Motif              | 39034       | ChIP    |                |
| p300      | Abcam                     | ab14984     | PLA     | 1/100          |
| TCF4      | Cell Signaling Technology | 2569S       | ChIP    |                |
| TCF4      | Merck Millipore           | 05-511      | ChIP    |                |
|           |                           |             | PLA     | 1/100          |
| Ki67      | Cell Signaling Technology | #9027       | IHC     | 1/100          |
| IgG       | Cell Signaling Technology | #3900       | ChIP    |                |

### Supplemental Material 1: List of antibodies used in this study

List the supplier, catalog number, purpose of use, and dilution rate for the antibodies used in this study.

## Supplemental Material 2

| Gene           | siRNA or ASO | Sequences (5'→3')                                                                                                                                                                                                                  |
|----------------|--------------|------------------------------------------------------------------------------------------------------------------------------------------------------------------------------------------------------------------------------------|
| Human CTNNB1#1 | siRNA        | CCCACTAATGTCCAGCGTT                                                                                                                                                                                                                |
| Human CTNNB1#2 | siRNA        | GCATAACCTTTCCCATCAT                                                                                                                                                                                                                |
| Human HNF4α#1  | siRNA        | ATGACTTGAGGCCTTACTT                                                                                                                                                                                                                |
| Human HNF4α#2  | siRNA        | CAGTCATTCTGGGAACATG                                                                                                                                                                                                                |
| Human FOXA2#1  | siRNA        | CAAGGGAGAAGAAATCCAT                                                                                                                                                                                                                |
| Human FOXA2#2  | siRNA        | AGAGGGTTGTACTATTGTT                                                                                                                                                                                                                |
| Control        | siRNA        | CAGTCGCGTTTGCG ACTGG                                                                                                                                                                                                               |
| Human GREB1    | ASO          | A(Y) <sup>^</sup> T(Y) <sup>^</sup> T(Y) <sup>^</sup> g <sup>^</sup> a <sup>^</sup> g <sup>^</sup> g <sup>^</sup> g <sup>^</sup> t <sup>^</sup> a <sup>^</sup> g <sup>^</sup> g <sup>^</sup> 5(Y) <sup>^</sup> A(Y) <sup>^</sup> a |
| Control        | ASO          | T(Y) <sup>^</sup> a <sup>^</sup> g <sup>^</sup> A(Y) <sup>^</sup> g <sup>^</sup> a <sup>^</sup> G(Y) <sup>^</sup> t <sup>^</sup> a <sup>^</sup> 5(Y) <sup>^</sup> c <sup>^</sup> c <sup>^</sup> A(Y) <sup>^</sup> t <sup>^</sup> c |

For ASO; Lower Case=DNA / N(Y)=AmNA / 5(Y)=AmNA\_mC / ^=Phosphorothioated

### Supplemental Material 2: List of siRNAs and antisense oligonucleotides (ASOs) used in this study

List of siRNA and ASO sequences for knockdown experiments used in this study.

### Supplemental Material 3

| Gene          | Forward                | Reverse                |
|---------------|------------------------|------------------------|
| Human GAPDH   | TCCTGCACCACCAACTGCTT   | TGGCAGTGATGGCATGGAC    |
| Human UBC     | CCTGGTGCTCCGTCTTAGAG   | TTTCCCAGCAAAGATCAACC   |
| Human GREB1   | GTGCTCTACCGGCTCAAGTT   | ACCGAGTCCACCACGTAGAT   |
| Human AXIN2   | CTGGCTCCAGAAGATCACAAAG | CATCCTCCCAGATCTCCTCAA  |
| Human HNF4A   | CGAGCAGATCCAGTTCATCA   | TCACACATCTGTCCGTTGCT   |
| Human FOXA2   | ACAGAGGGCCACACAGATA    | GCTTGAAGAAGCAGGAGTCTAC |
| Human GINS1   | GGTCACTGGGAGGAGATGAA   | GCTCCAGGACTCCTTGTCTG   |
| Human SF3B6   | CGAACATTCGACTTCCACCT   | ACATGCATTCTTGGCATCAA   |
| Human SEC13   | CGTGTGTTTCATTTGGACCTG  | CCCTCTGTCACTGATGCTGA   |
| Human PSMG4   | GCTGAATGCTCCACTCTTCC   | GGGAAAGCCTCCATCTCTTC   |
| Human RBMX    | TGGAAGCAGTCGCTATGATG   | GAGGGTACCCCTTTCCATA    |
| Human NDUFA10 | TGAAGCGGGGATTCATTATC   | CACAACACCTTGTCCCTGTGG  |
| Human TBCA    | GGATGATGATCCCAGATTGC   | GCGGTATAAAGGGCAAGTGA   |
| Human IGF2    | GTGCTGTTTCCGCAGCTG     | AGGGGTGACACGTCCCTC     |
| Human LIN28B  | CCTCCTCAGCCAAAGAAGTG   | GTGGTGATGTACAGCCATGC   |
| Human TMEM245 | AGCCCTACTCCTGACTGCAA   | GCAGAATTCAGGGCTCTTTG   |
| Human TRIB2   | GATGATTCCCTCTCCGACAA   | AAGAGGGAGCTGGGTTCAAT   |
| Human FOXRED2 | ATCAGTGCAGCGTCTCTTT    | CTGTCTCAAAGGCCGAGTTC   |

#### Supplemental Material 3: List of primers used in this study

List of primer sequences for real-time PCR analysis used in this study.
